# 1 Synergistic effect of short- and long-read 2 sequencing on functional meta-omics

3 Valentina Galata<sup>1,#</sup>, Susheel Bhanu Busi<sup>1,#</sup>, Benoît Josef Kunath<sup>1</sup>, Laura de Nies<sup>1</sup>, Magdalena  
4 Calusinska<sup>2</sup>, Rashi Halder<sup>1</sup>, Patrick May<sup>1</sup>, Paul Wilmes<sup>1</sup>, Cédric Christian Laczny<sup>1\*</sup>

5

6 <sup>1</sup> Luxembourg Centre for Systems Biomedicine, 7, avenue des Hauts-Fourneaux, Esch-sur-  
7 Alzette, L-4362, Luxembourg

8 <sup>2</sup> BioSystems and Bioprocessing Engineering, Luxembourg Institute of Science and Technology,  
9 Rue du Brill 41, Belvaux, L-4422, Luxembourg

10 \* Corresponding author

11 # Equal contribution

12

13 [valentina.galata@uni.lu](mailto:valentina.galata@uni.lu), [susheel.busi@uni.lu](mailto:susheel.busi@uni.lu), [benoit.kunath@uni.lu](mailto:benoit.kunath@uni.lu), [laura.denies@uni.lu](mailto:laura.denies@uni.lu),  
14 [magdalena.calusinska@list.lu](mailto:magdalena.calusinska@list.lu), [rashi.halder@uni.lu](mailto:rashi.halder@uni.lu), [patrick.may@uni.lu](mailto:patrick.may@uni.lu), [paul.wilmes@uni.lu](mailto:paul.wilmes@uni.lu),  
15 [cedric.laczny@uni.lu](mailto:cedric.laczny@uni.lu)

16

## 17 Abstract

18 Real-world evaluations of metagenomic reconstructions are challenged by distinguishing  
19 reconstruction artefacts from genes and proteins present *in situ*. Here, we evaluate short-read-  
20 only, long-read-only, and hybrid assembly approaches on four different metagenomic samples of  
21 varying complexity and demonstrate how they affect gene and protein inference which is  
22 particularly relevant for downstream functional analyses. For a human gut microbiome sample,  
23 we use complementary metatranscriptomic, and metaproteomic data to evaluate the  
24 metagenomic data-based protein predictions. Our findings pave the way for critical assessments  
25 of metagenomic reconstructions and we propose a reference-independent solution based on the  
26 synergistic effects of multi-omic data integration for the *in situ* study of microbiomes using long-  
27 read sequencing data.

28

## 29 Keywords

30 Third-generation sequencing, long reads, Oxford Nanopore Technologies, short reads, hybrid  
31 assembly, metagenomics, metatranscriptomics, metaproteomics, functional omics, meta-omics

32

## 33 Background

34 Third-generation, single-molecule, long-read (LR) sequencing is considered to be the next  
35 frontier of genomics [1], especially in the context of studying microbial populations [2,3]. Given  
36 the ability to attain read lengths in excess of 10 Kbp [4] and sequence accuracy improvements  
37 [5], LR sequencing has been recommended for its ability to resolve GC-rich regions, complex and  
38 repetitive loci, and segmental duplications in genomes [4]. However, LR applications to study  
39 microbiomes have focused on genome assemblies [6,7], closing a select few bacterial genomes  
40 [8], haplotype and strain resolution [9] as well as mock (low diversity) communities [3]. Stewart *et*  
41 *al.*, recently were among the first to demonstrate the utility of using LRs for improving upon  
42 existing protein databases owing to a large collection of novel proteins and enzymes identified  
43 [10], thereby hinting at the benefits of LR also for functional microbiome studies.

44 Single base-accuracy of raw LRs remains lower - for now - compared to short-read (SR)  
45 methodologies [11]. Several approaches including assembly-based and/or including polishing  
46 steps have been developed [11–13] to increase the accuracy. The impact of remnant errors in LR  
47 assemblies on gene calling and thereby protein prediction was recently highlighted by Watson *et*  
48 *al.* [14]. Hybrid (HY) assembly methods [15,16] using both SRs and LRs have been proposed to  
49 further reduce the error rates compared to LR-only assemblies. While Watson *et al.* [14] showed  
50 that insertions/deletions (indels) play a critical role in microbial protein identification, the overall  
51 impact of assembly methods on understanding the functional potential of microbial communities  
52 is lacking.

53 Here, we demonstrate that metagenomic assembly methods (SR, LR and HY) not only  
54 differ markedly in their overall assembly performance, but also in the inferred functional potential.  
55 We reveal the effects of the assembly method on predicted genes and proteins in samples with a  
56 low to high diversity, from mock communities to human fecal and rumen metagenomes. We found  
57 proteins which are exclusive to respective assemblers and additionally demonstrate using  
58 metatranscriptomic and metaproteomic data available for the human fecal sample the synergistic  
59 effect on protein verification. Our results indicate that irrespective of sample diversity, the

60 sequencing and assembly strategies impact downstream analyses and that complementary  
61 omics are a key dimension for functional analyses of microbiomes.

62

## 63 Results and Discussion

64 To understand how sample diversity, assembly quality, and assembly approach are linked,  
65 we assembled published metagenomic (metaG) data from a mock community (Zymo), a natural  
66 whey starter culture (NWC), a cow rumen sample (Rumen), and a novel metagenomic dataset  
67 from a human fecal sample (GDB) which was complemented with metatranscriptomic (metaT)  
68 and metaproteomic (metaP) data. The samples' diversity ranged from low (Zymo and NWC) to  
69 high (GDB and Rumen). As expected [10], the assembly approach affected strongly the quality of  
70 the resulting assembly (Supp. Fig. 1). LR and HY approaches generated fewer contigs with a  
71 larger N50 value. However, other assembly metrics, e.g., the total assembly length, varied  
72 between the samples and assembly types. The metaG read mapping rate (including multi-  
73 mapped reads), as a proxy of data usage, was unaffected by the assembler choice when  
74 considering all contigs, though the values for the LR assemblies were a bit lower than for SR or  
75 HY assemblies of the high-diversity samples (GDB and Rumen). However, the mapping rates  
76 dropped markedly in SR assemblies, especially in NWC and Rumen, when filtering out contigs  
77 below 5000bps (Supp. Fig. 2). In GDB, we observed higher metaT read mapping rates in SR and  
78 HY assemblies than in LR assemblies. This indicates the complementarity of SR and LR data.  
79 The mapping rates decreased considerably in SR assemblies when removing short contigs  
80 (Supp. Fig. 3) suggesting the presence of expressed genes located on these contigs. This  
81 demonstrates the loss of information when contigs below a certain threshold are removed, which  
82 is frequently done in metagenomic studies.

83 Comparing assemblies pairwise, we observed higher dissimilarities between the LR and  
84 SR/HY assemblies than within the latter groups. Additionally, OPERA-MS-based HY assemblies  
85 clustered together with the SR assemblies on which they were based (Supp. Fig. 4). To assess  
86 functional potential overlap between the different assembly approaches, we studied the proteins  
87 found in the individual metagenomes. The overall number and quality of predicted proteins was  
88 highly influenced by the assembly approach. In highly diverse metagenomes (GDB and Rumen),  
89 the total number of proteins in SR and HY assemblies was higher (by a factor of up to 3.67) than  
90 in LR assemblies (Fig 1i). However, throughout all samples, the SR and HY approaches produced  
91 more partial proteins (incomplete CDS). We clustered the predicted protein sequences and found  
92 a considerable number of proteins exclusive to individual assembly. We also found proteins that

93 were shared within a subset of the assemblies only. Furthermore, we observed that increased  
94 sample diversity resulted in an overall increase in the number of exclusive proteins (Fig 1ii).

95 As reported previously by Watson *et al.* [14], errors in LR assemblies can have an impact  
96 on the predicted proteins. To evaluate how the sample diversity might affect this, we mapped the  
97 predicted proteins against the UniProtKB/TrEMBL non-redundant (nr) protein database and  
98 computed the query/subject length ratio. In all cases, the density distribution of the ratio values  
99 had two peaks (below 0.5 and around 1) though the differences between the assembly methods  
100 varied across the samples (Supp. Fig. 5). Considering the above findings and despite multiple  
101 rounds of polishing, we cannot disregard the impact of errors in long reads affecting the results.  
102 Furthermore, we are aware that the results may also be affected by the sequencing depth and  
103 gene prediction methods. One also has to account for the microbial composition per sample, given  
104 that a large proportion of proteins from the Rumen sample might not have homologs within the  
105 used database.

106 Due to the differences in annotations, which we found to be exclusive to individual  
107 assembly approaches, we subsequently studied the effect of assembler choice on two well  
108 defined, functionally relevant classes of genes: ribosomal RNA (rRNA) and antimicrobial  
109 resistance (AMR) genes. Overall, the total number of rRNA genes recovered by LR and HY  
110 approaches was higher across all samples. Within the archaeal and bacterial domains, LR and  
111 HY assemblies led to the prediction of more complete genes compared to SR (Supp. Fig. 6).  
112 When analysing AMR proteins and focusing only on “strict” hits (i.e. excluding loose hits flagged  
113 as “nudged” by the RGI tool, see Methods), HY assemblers were more adept at identifying these  
114 proteins compared to either SR or LR. Moreover, LR assemblies contained more “nudged” hits  
115 than SR or HY assemblies, suggesting that error rates or other factors might have affected the  
116 reconstruction of some AMR genes (Fig 2i). Interestingly, we did not identify any AMR hits in the  
117 NWC metagenome, possibly due to it being a food-grade additive [17]. When comparing the  
118 overlap of the Antibiotic Resistance Ontology (ARO) terms covered by “strict” hits, we found that  
119 some AROs were only identified in SR and HY assemblies, but not in LR, whereas no AROs were  
120 found in LR assemblies only (Fig 2ii).

121 To validate the exclusive AROs found in SR and HY assemblies, we assessed metaT and  
122 metaP coverage of the corresponding genes and proteins in the GDB sample. The genes  
123 mapping to the exclusive AROs had an average metaT coverage above 14x in the SR and HY  
124 assemblies suggesting that these genes are expressed *in situ*; the few “nudged” hits were below  
125 6x (Supp. Tab. 1). However, we did not identify these genes in the metaP data potentially due to  
126 low expression levels, variation in extraction protocols, and/or post-translational modifications

127 affecting the peptide/proteomic recovery. Though no “strict” hits were found in LR assemblies,  
128 some of their “nudged” hits had an average metaT coverage above 10x. To understand why these  
129 seemingly expressed genes obtained only a partial hit, we focused on two “nudged” hits assigned  
130 to ARO 3004454 (a chloramphenicol acetyltransferase) in the LR assembly constructed with Flye.  
131 We found that the corresponding coding sequences (CDSs) were located on the same contig and  
132 had an overlap of 29 bps. The sequence alignments showed that the respective genes represent  
133 two fragments of the true CDS (corresponding to ARO 3004454) most likely created by an indel  
134 which introduced a frameshift and also a premature stop codon. This finding was also supported  
135 by the metaT coverage extending beyond the stop codon of the first CDS until the end of the  
136 second CDS with a single drop in coverage before the putative indel (Fig 2iii).

137 To identify high-confidence proteins without the need for a reference, we first considered  
138 proteins and protein clusters found in all assemblies which represented 22.97% of the proteins  
139 and 8.54% of the protein clusters. These included genes reconstructed by the different and  
140 independent assembly approaches, thus lending mutual support. We then used the  
141 complementary metaT data and included all additional proteins with an average metaT coverage  
142  $\geq 10x$  and the corresponding protein clusters. This doubled the number of high-confidence  
143 protein clusters (17.63%) and increased the percentage of high-confidence proteins to 30.32%.

144

## 145 Conclusions

146 We reveal that sample diversity, along with assembly-mediated effects influence  
147 prediction of genes and proteins. This causes discrepancies between the assemblies, thereby  
148 requiring complementary means to validate these predictions. The observed discrepancies  
149 included conserved and also functionally relevant genes (rRNA and antimicrobial resistance  
150 genes, respectively), potentially impacting phylogenetic as well as functional studies. To  
151 overcome this, we propose a reference-independent approach to identify high-confidence  
152 genomic reconstructions by combining metagenomic and metatranscriptomic data. Overall, we  
153 show that the sequencing approach and assembly strategy can have a significant impact on the  
154 characterization of the microbiome’s functional potential and demonstrate the added value of  
155 multi-omic strategies for reconstruction quality evaluation, i.e. going beyond their original purpose,  
156 to resolve the functional microbiome.

157

## 158 Methods

159 Freshly collected human fecal samples from a healthy volunteer (GDB) were immediately flash-  
160 frozen in liquid nitrogen and stored at  $-80^{\circ}\text{C}$ ; high-molecular weight (HMW) DNA was obtained  
161 following the protocol proposed recently [8], with minor modifications; samples were sequenced  
162 on Illumina and Oxford Nanopore MinION respectively. Metagenomic sequencing data of three  
163 publicly available samples was included: the Zymo mock community (Zymo) [3], a natural whey  
164 starter culture (NWC) [17] and a cow rumen (Rumen) [10] dataset. Assemblies were built from  
165 short reads (SR), long reads (LR), and short and long reads (HY). The LR and HY assemblies  
166 were polished. All assemblies were annotated by predicting rRNA genes and proteins, and  
167 matching the latter to the CARD database [18]. For each sample, assemblies were compared,  
168 and proteins were clustered. For the GDB sample, metatranscriptomic (metaT) and  
169 metaproteomic (metaP) data were additionally used in the downstream analysis. Detailed  
170 information on extraction, sequencing and analysis can be found in the Supplementary  
171 Information.

172

## 173 Abbreviations

- 174 ● SR: short reads
- 175 ● LR: long reads
- 176 ● HY: hybrid (approach/assembly)
- 177 ● metaG: metagenomic (data)
- 178 ● metaT: metatranscriptomic (data)
- 179 ● metaP: metaproteomic (data)
- 180 ● AMR: antimicrobial resistance
- 181 ● rRNA: ribosomal RNA

## 182 Declarations

### 183 Ethics approval and consent to participate

184 This study conformed to the Declaration of Helsinki and was approved by the ethics committee of  
185 the Physician's Board Hessen, Germany (FF38/2016).

## 186 Consent for publication

187 All authors acknowledge the content of this manuscript and consent to its publication.

## 188 Availability of data and materials

189 Processed sequencing data of the GDB sample is available under BioProject accession  
190 PRJNA723028 (Biosamples: metag\_sr: SAMN18797629, metat\_sr: SAMN18797630, and  
191 metag\_lr: SAMN18797631). Metaproteomics data of the GDB sample is available at  
192 ProteomeXchange under accession PXD025505. The code used for the analysis is available at  
193 <https://doi.org/10.6084/m9.figshare.14447553> and supplementary data of relevant results is  
194 available at <https://doi.org/10.6084/m9.figshare.14447559>.

## 195 Competing interests

196 The authors declare no competing interests.

## 197 Funding

198 SBB was supported by the Synergia grant (CRSII5\_180241) through the Swiss National Science  
199 Foundation (in collaboration with Dr. Tom Battin at EPFL, Switzerland). PW acknowledges the  
200 European Research Council (ERC-CoG 863664). LdN, PW, and PM were supported by the  
201 Luxembourg National Research Fund (FNR; PRIDE17/11823097). BJK was supported by the  
202 FNR (C19/BM/13684739 and PRIDE17/11823097). VG was supported by “Probiotics in external  
203 applications (PBGL)”. CCL and MC were supported by the FNR (C17/SR/11687962).

## 204 Authors' contributions

205 SBB, VG, and CCL designed the study. SBB and RH performed the biomolecular extractions,  
206 while RH performed the metagenomic and metatranscriptomic sequencing. VG, SBB, LdN and  
207 CCL analysed the data. BJK performed the metaproteomic analyses. PM, MC and PW provided  
208 critical feedback and insights. All authors contributed to the writing and revision of the manuscript.

## 209 Acknowledgements

210 We are thankful for the assistance of Audrey Frachet Bour, Lea Grandmougin, Janine Habier and  
211 Laura Lebrun (LCSB) for laboratory support. The experiments presented in this paper were  
212 carried out using the HPC facilities of the University of Luxembourg (<https://hpc.uni.lu> [19]).  
213



## 214 Supplementary Information: Methods

### 215 Sample origin & collection

216 Human fecal samples were freshly collected from a healthy volunteer (GDB) and  
217 immediately flash-frozen in liquid nitrogen. The samples were stored at  $-80^{\circ}\text{C}$  until they were  
218 processed for biomolecular extraction.

### 219 Biomolecular extraction

220 To obtain high-molecular weight (HMW) DNA, we followed the protocol proposed recently  
221 [8], with minor modifications. Frozen stool sample was weighed out in triplicates, to 0.7g and  
222 aliquoted into phase-lock gel tubes (Fisher Scientific, Waltham, MA), along with a 4mm stainless  
223 steel grinding ball (RETSCH 22.455.0003). The sample was subsequently suspended in 500 $\mu\text{L}$   
224 PBS (Fisher Scientific, Waltham, MA) with brief gentle vortexing at 10 second intervals repeated  
225 5 times. Thereafter, 5 $\mu\text{L}$  of lytic enzyme solution (Qiagen, Hilden, Germany) was added and the  
226 samples were mixed by gentle inversion six times, then incubated for one hour at  $37^{\circ}\text{C}$ . 12 $\mu\text{L}$  20%  
227 (w/v) SDS (Fisher Scientific, Waltham, MA) was added followed by 500 $\mu\text{L}$   
228 phenol:chloroform:isoamyl alcohol at pH 8 (Fisher Scientific, Waltham, MA). The samples were  
229 gently vortexed for five seconds, then centrifuged at 10,000g for five minutes. The aqueous phase  
230 was decanted into a new 2mL tube. Next, the DNA was precipitated with 90 $\mu\text{L}$  3M sodium acetate  
231 (Fisher Scientific) and 500 $\mu\text{L}$  isopropanol (Fisher Scientific). After slowly inverting three times,  
232 samples were incubated at room temperature for 10 minutes, followed by centrifugation for 10  
233 minutes at 10,000g. The supernatant was removed, and the pellet was washed twice with freshly  
234 prepared 80% (v/v) ethanol (Fisher Scientific). Washing was done by adding 1 ml of 80% EtOH,  
235 followed by centrifugation for 10 minutes at 10,000g. The pellet was then air dried with heating  
236 for ten minutes at  $37^{\circ}\text{C}$  or until the pellet was matte in appearance, and then resuspended in  
237 100 $\mu\text{L}$  nuclease-free water (Ambion, ThermoFisher Scientific, Waltham, MA). To the pellet, 1mL  
238 Qiagen buffer G2, 4 $\mu\text{L}$  Qiagen RNase A at 100mg/mL, and 25 $\mu\text{L}$  Qiagen Proteinase K were  
239 added. The samples were then gently inverted three times and incubated for 90 minutes at  $56^{\circ}\text{C}$ .  
240 After the first 30 minutes, pellets were dislodged by a single gentle inversion. During the 90-  
241 minutes incubation, one Qiagen Genomic-tip 20/G column per triplicate sample was equilibrated  
242 with 1mL Qiagen buffer QBT and allowed to empty by gravity flow. Samples were gently inverted  
243 twice, applied to columns and allowed to flow through. Three stool extractions (triplicates for each

244 sample) were combined per column. Columns were then washed with 3mL Qiagen buffer QC,  
245 where 1 ml of QC buffer was added each time and allowed to drain the column. Next, the column  
246 was placed in a new, sterile 1.5 mL Eppendorf tube and the DNA was then eluted with 1mL of  
247 Qiagen buffer QF prewarmed to 56°C. The eluted DNA was then precipitated by addition of 700µL  
248 isopropanol and incubated at room temperature for 10 minutes, followed by inversion and  
249 centrifugation for 15 minutes at 10,000g. The supernatant was carefully removed by pipette, and  
250 pellets were washed with 1mL 80% (v/v) ethanol. (Washing = add 1 ml EtOH, centrifuge for 10  
251 minutes at 10,000g). Residual ethanol was removed by air drying ten minutes at 37°C, followed  
252 by resuspension of the pellet in 100µL water overnight at 4°C without agitation of any kind. The  
253 pooled sample was quantified using the Qubit Broad-Range DNA concentration kit, and was  
254 estimated at 323.35 ng/µL with an  $OD_{260/280} = 1.85$ . The extracted HMW DNA was used for both  
255 short- and long-read sequencing. RNA was extracted from an aliquot of the same fecal sample  
256 using PowerMicrobiome RNA isolation kit (cat. no. 26000-50, MoBio) as suggested by the  
257 manufacturer. For the protein extractions, a modified protocol based on previously established  
258 sequential extraction method [20] was used. Briefly, proteins were precipitated by adding one  
259 volume of APP Buffer to the flow-through from an independent RNA purification, followed by  
260 mixing and incubation for 10 minutes at room temperature. After incubation, the mixture was  
261 centrifuged for 10 minutes at 12000 g and the pellet was washed twice in 70% ethanol, with 1  
262 minute centrifuge cycles at 12000 g, and dried at room temperature for 7 minutes after removing  
263 excess ethanol. The pellet was then dissolved in 100µL ALO buffer and incubated for 5 minutes  
264 at 95 °C. After complete dissolution and denaturation of the protein, the sample was cooled to  
265 room temperature and centrifuged for 1 minute at 12000 g, from which the supernatant was  
266 collected for downstream protein analysis.

## 267 Sequencing

268 *Short-read sequencing:* All DNA samples were subjected to random shotgun sequencing.  
269 The sequencing libraries were prepared using Kapa hyperplus Kit (cat. no. 07962401001, Roche)  
270 for the fecal sample using the protocol provided with the kit. Enzymatic fragmentation time was  
271 15 minutes to aim for 350bp average size. There was no additional PCR amplification of prepared  
272 libraries.

273 RNA samples for metaT analysis were subjected to rRNA depletion using the QIAseq  
274 FastSelect 5S/16S/23S kit (cat. no. 335921, Qiagen) for the fecal sample. Library preparation of  
275 rRNA-depleted RNA was done using TruSeq Stranded mRNA library preparation kit (cat. no.

276 20020594, Illumina) according to the protocol provided by the manufacturer with the exception of  
277 omitting the initial steps for mRNA pull down.

278 Both metaG and metaT libraries were quantified using Qubit HS assay (Invitrogen) and  
279 their quality was assessed on a Bioanalyzer HS chip (Agilent). We used the NextSeq500  
280 (Illumina) instrument to perform the sequencing using 2x150bp read length at the LCSB  
281 Sequencing Platform.

282 *Long-read sequencing:* DNA library for the fecal sample was size selected using AMPure  
283 beads for longer fragments. The DNA was sheared using a G-tube (cat. no. 520079, Covaris)  
284 aiming for 8kb average size according to the protocol provided by the manufacturer. Library  
285 preparation for long read sequencing was done using genomic DNA ligation kit (SQK-LSK109)  
286 according to the protocol provided. Once all the library loaded on the flowcell was finished, the  
287 library was reloaded after either flowcell wash or nuclease flush. In total, the library was loaded 4  
288 times to achieve 16Gbp of sequencing data for this fecal sample.

## 289 Data analysis

290 Snakemake (v. 5.18.1) [21] was used to implement the analysis workflow. We provide a  
291 brief description of the most important steps in the following.

### 292 Sequence data preprocessing

293 *Short-reads:* The raw short reads were trimmed and preprocessed with fastp (v. 0.20.0)  
294 [22] with a minimum length of 40 bp. FastQC (v. 0.11.9) [23] reports were generated from the  
295 processed FASTQ files. MetaT short reads from the GDB sample were filtered by discarding reads  
296 mapping to rRNA gene references included in the repository of SortMeRNA [24] (v4.2.0-10-  
297 g1358b9b, <https://github.com/biocore/sortmerna>) using BBDuk from the BBMap toolkit (v.38.86,  
298 kmer length set to 31 bp) [25]. Additionally, for the GDB sample, reads mapping to the human  
299 genome (GCF\_000001405.38\_GRCh38.p12) were removed using BBDuk (kmer length set to 31  
300 bp, input and output quality encoding offset set to 33).

301 *Long reads:* For each sample except NWC, single-FAST5 files were converted to multi-  
302 FAST5 files using single\_to\_multi\_fast5 from ont-fast5-api (v. 3.1.5), the resulting files were  
303 basecalled using guppy on a GPU node (v. 3.6.0+98ff765, configuration file  
304 dna\_r9.4.1\_450bps\_modbases\_dam-dcm-cpg\_hac.cfg, disabled transmission of telemetry pings,  
305 chunk size of 1000, 8000 records per FASTQ file) and concatenated into a single FASTQ file. For  
306 NWC, no FAST5 were available and, thus, only the provided FASTQ file was used for the analysis.

307 Nanostat (v. 1.1.2) [26] reports were created from the FASTQ files using default parameters. As  
308 for the short reads, long reads of the GDB sample were filtered to remove reads mapping to the  
309 human genome (GCF\_000001405.38\_GRCh38.p12) using the same parameters.

## 310 Metagenomic assembly

311 *Short-reads:* Short-read assemblies were done using preprocessed reads, and MEGAHIT  
312 and metaSPAdes. MEGAHIT (v. 1.2.9) [27] was run using default parameters; metaSPAdes (v.  
313 3.14.1) [28] was run using kmer lengths 21, 33, 55 and 77 bp.

314 *Long-reads:* Long-read assemblies were done using Flye and Raven. Flye (v. 2.8.1) [29]  
315 was run by providing the (processed) long reads in a FASTQ file (input parameter "--nano-raw")  
316 and with the flag "--meta". Raven (v. 1.2.2) [30] was run with default parameters. Assemblies were  
317 polished using long and short reads: one round of Racon (v. 1.4.13) [31] with long reads using  
318 the flag "--include-unpolished" where reads were mapped to contigs using BWA MEM (v. 0.7.17)  
319 [32] with the option "-x ont2d" and processed using samtools (v. 1.9); four rounds of Racon with  
320 short reads using the flag "--include-unpolished" where reads were mapped to contigs using BWA  
321 MEM and processed using samtools; one round of Medaka (v. 0.8.1) [33] with long reads using  
322 the model "r941\_min\_high".

323 *Hybrid:* Hybrid assemblies, i.e. using short and long reads together, were done using  
324 metaSPAdes and OPERA-MS. SPAdes was run with the flag "--meta" and the same k-mer lengths  
325 as the SR assemblies by additionally providing the long reads using the input parameter flag "--  
326 nanopore". OPERA-MS (v. v0.8.2-63-gc18b4f3) [15] was run using paired short reads, long reads  
327 and the SR assemblies created by MEGAHIT and metaSPAdes, respectively, using minimap2  
328 [34] as the long read mapper. The assemblies were polished by running five rounds of Racon with  
329 short reads as described for the LR assemblies. If not stated otherwise, only polished contigs  
330 were used for the LR and HY assemblies in the following analysis steps.

## 331 Mapping rate and assembly coverage

332 For the mapping rate, the used reads were mapped back to the contigs and processed  
333 using BWA MEM and samtools in the same fashion as described above when polishing the LR  
334 and HY assemblies using Racon. For hybrid assemblies, both long and short reads were mapped  
335 to the polished contigs and the BAM files were merged using samtools. For the sample GDB,  
336 metatranscriptomic (metaT) short reads were also separately mapped to the (polished) contigs.  
337 Mapping statistics were computed from the BAM files using samtools' options "flagstat", to

338 determine the number of reads mapping back to the assemblies, and “idxstats” for per-contig  
339 mapping information. For GDB, metaT per-base coverage was computed for each assembly from  
340 the BAM files using bedtools (v. 2.29.2)[35] (utility “genomecov” with the parameter “-d”).

## 341 Assembly annotation

342 For each sample and assembly, protein prediction was done using Prodigal (v. 2.6.3) [36]  
343 using the option “-p meta”; the keyword “partial” in the headers of the obtained protein FASTA  
344 files was used to distinguish complete and partial proteins. Known antibiotic resistance factors  
345 were searched in the predicted proteins (after discarding the stop codon symbol “\*”) from the  
346 FASTA files) by running RGI (v. 5.1.1) [37] together with the CARD database (v. 3.1.0) [18] and  
347 DIAMOND (v. 0.8.36) [38] for protein alignments. Loose hits flagged as “nudged” by the tool were  
348 highlighted as such (i.e. as “nudged”) in the downstream analysis.

349 The tool barrnap (v. 0.9) [39] was run to predict rRNA genes on assembly contigs using  
350 the four provided databases of bacterial, archaeal, metazoan mitochondrial and eukaryotic rRNA  
351 genes, respectively. Predictions containing the word “partial” in their product annotation in the  
352 obtained GFF files were considered as partial hits.

## 353 Analysis

354 Assembly statistics were computed by running metaQUAST (v. 5.0.2) [40] without using  
355 any genome references, setting the minimum contig length to 0 bps and retrieving the statistics  
356 for the contig length thresholds of 0, 1000, 2000 and 5000 bps subsequently. Per sample,  
357 assemblies were compared using Mash (v. 2.2.2) [41]: sketches were computed per assembly  
358 using a k-mer length of 31 bps and a sketch size of 100000, and pairwise distances were then  
359 estimated. Per sample, proteins from all assemblies were clustered using MMseqs2 (v. 12.113e3)  
360 [42]. First, a database was created from a concatenated FASTA file of protein sequences (“--  
361 dbtype 1”). Then, option “linclust” with default parameters was used to perform the clustering and  
362 the obtained files were converted to tables using option “createtsv”. DIAMOND (v. 0.9.25) [38][43]  
363 with the option “blastp” and default parameters was used to align the predicted proteins against  
364 the UniProtKB/TrEMBL database (downloaded and created on August 24 2019 from  
365 [http://ftp.uniprot.org/pub/databases/uniprot/current\\_release/knowledgebase/complete/](http://ftp.uniprot.org/pub/databases/uniprot/current_release/knowledgebase/complete/), archive  
366 uniprot\_trembl.fasta.gz) [44]. The created DAA files were converted to tables using option “view”  
367 and the parameter “--max-target-seqs 1”. When processing the hits, these were sorted per query  
368 and e-value in an ascending order and only the first hit was used. For GDB and metaT, using the

369 per-base coverage information computed for each assembly, average coverage was computed  
370 for the corresponding gene sequences of each predicted protein.

## 371 MS/MS acquisition and metaproteomic analysis

372 1µg of extracted proteins was denatured and briefly loaded on a SDS gel to produce one gel  
373 band. The reduction, alkylation and tryptic digestion of the proteins into peptides were performed  
374 in-gel. The tryptic peptides were extracted from the gel and desalted prior to mass spectrometry  
375 analysis. Peptides were analyzed using a nanoLC-MS/MS system (120 minutes gradient)  
376 connected to a Q-Exactive HF orbitrap mass spectrometer (Thermo Scientific, Germany)  
377 equipped with a nano-electrospray ion source. The Q-Exactive mass spectrometer was operated  
378 in data-dependent mode and the 10 most intense peptide precursor ions were selected for  
379 fragmentation and MS/MS acquisition.

380 For each assembly separately and for all assemblies together, the FASTA file of predicted  
381 proteins was concatenated with a cRAP database of contaminants [45] and with the human  
382 UniProtKB Reference Proteome prior metaproteomic search. In addition, reversed sequences of  
383 all protein entries were concatenated to the databases for the estimation of false discovery rates.  
384 The search was performed using SearchGUI-3.3.20 [46] with the X!Tandem [47], MS-GF+ [48]  
385 and Comet [49] search engines and the following parameters: Trypsin was used as the digestion  
386 enzyme, and a maximum of two missed cleavages was allowed. The tolerance levels for matching  
387 to the database was 10 ppm for MS1 and 0.2 Da for MS2. Carbamidomethylation of cysteine  
388 residues was set as a fixed modification and protein N-terminal acetylation and oxidation of  
389 methionines was allowed as variable modification. Peptides with length between 7 and 60 amino  
390 acids, and with a charge state composed between +2 and +4 were considered for identification.  
391 The results from SearchGUI were merged using PeptideShaker-1.16.45 [50] and all identifications  
392 were filtered in order to achieve a protein false discovery rate (FDR) of 1%.

## 393 Plots

394 Figures were generated in R (v. 4.0.2, <https://www.r-project.org/>) using, *inter alia*, Pheatmap (v.  
395 1.0.12, <https://github.com/raivokolde/pheatmap>) for heatmap plots, UpSetR (v. 1.4.0) [51] for  
396 intersection plots, ggplot2 (v 3.3.2) [52] and its various extensions for other plot types, color  
397 palettes from the viridis (v. 0.5.1, developed by Stéfan van der Walt and Nathaniel Smith,  
398 <https://github.com/sjmgarnier/viridis>) and ggsci (v. 2.9, <https://github.com/road2stat/ggsci>)

399 packages and the patchwork package (v. 1.1.1, <https://github.com/thomasp85/patchwork>) for  
400 combining plots.

## 401 References

- 402 1. Burgess DJ. Genomics: Next generation sequencing for reference genomes. *Nat. Rev.*  
403 *Genet.* 2018. p. 125.
- 404 2. Amarasinghe SL, Su S, Dong X, Zappia L, Ritchie ME, Gouil Q. Opportunities and challenges  
405 in long-read sequencing data analysis. *Genome Biol.* 2020;21:30.
- 406 3. Nicholls SM, Quick JC, Tang S, Loman NJ. Ultra-deep, long-read nanopore sequencing of  
407 mock microbial community standards. *Gigascience* [Internet]. 2019;8. Available from:  
408 <http://dx.doi.org/10.1093/gigascience/giz043>
- 409 4. Pollard MO, Gurdasani D, Mentzer AJ, Porter T, Sandhu MS. Long reads: their purpose and  
410 place. *Hum Mol Genet.* 2018;27:R234–41.
- 411 5. Jain M, Koren S, Miga KH, Quick J, Rand AC, Sasani TA, et al. Nanopore sequencing and  
412 assembly of a human genome with ultra-long reads. *Nat Biotechnol.* 2018;36:338–45.
- 413 6. Goldstein S, Beka L, Graf J, Klassen JL. Evaluation of strategies for the assembly of diverse  
414 bacterial genomes using MinION long-read sequencing. *BMC Genomics.* 2019;20:23.
- 415 7. Logsdon GA, Vollger MR, Eichler EE. Long-read human genome sequencing and its  
416 applications. *Nat Rev Genet.* 2020;21:597–614.
- 417 8. Moss EL, Maghini DG, Bhatt AS. Complete, closed bacterial genomes from microbiomes  
418 using nanopore sequencing. *Nat Biotechnol.* 2020;38:701–7.
- 419 9. Nicholls SM, Aubrey W, De Grave K, Schietgat L, Creevey CJ, Clare A. On the complexity of  
420 haplotyping a microbial community. *Bioinformatics* [Internet]. 2020; Available from:  
421 <http://dx.doi.org/10.1093/bioinformatics/btaa977>
- 422 10. Stewart RD, Auffret MD, Warr A, Walker AW, Roehe R, Watson M. Compendium of 4,941  
423 rumen metagenome-assembled genomes for rumen microbiome biology and enzyme discovery.  
424 *Nat Biotechnol.* 2019;37:953–61.
- 425 11. Zhang H, Jain C, Aluru S. A comprehensive evaluation of long read error correction  
426 methods. *BMC Genomics.* 2020;21:889.
- 427 12. Ryan R, Wick KEH. Benchmarking of long-read assemblers for prokaryote whole genome  
428 sequencing. *F1000Res* [Internet]. Faculty of 1000 Ltd; 2019 [cited 2021 Mar 19];8. Available  
429 from: <https://www.ncbi.nlm.nih.gov/pmc/articles/PMC6966772/>
- 430 13. Dohm JC, Peters P, Stralis-Pavese N, Himmelbauer H. Benchmarking of long-read  
431 correction methods. *NAR Genom Bioinform.* 2020;2:lqaa037.
- 432 14. Watson M, Warr A. Errors in long-read assemblies can critically affect protein prediction.

- 433 Nat. Biotechnol. 2019. p. 124–6.
- 434 15. Bertrand D, Shaw J, Kalathiyappan M, Ng AHQ, Kumar MS, Li C, et al. Hybrid metagenomic  
435 assembly enables high-resolution analysis of resistance determinants and mobile elements in  
436 human microbiomes. *Nat Biotechnol.* 2019;37:937–44.
- 437 16. Haghshenas E, Asghari H, Stoye J, Chauve C, Hach F. HASLR: Fast Hybrid Assembly of  
438 Long Reads. *iScience.* 2020;23:101389.
- 439 17. Somerville V, Lutz S, Schmid M, Frei D, Moser A, Irmeler S, et al. Long-read based de novo  
440 assembly of low-complexity metagenome samples results in finished genomes and reveals  
441 insights into strain diversity and an active phage system. *BMC Microbiol.* 2019;19:143.
- 442 18. Alcock BP, Raphenya AR, Lau TTY, Tsang KK, Bouchard M, Edalatmand A, et al. CARD  
443 2020: antibiotic resistance surveillance with the comprehensive antibiotic resistance database.  
444 *Nucleic Acids Res.* 2020;48:D517–25.
- 445 19. Management of an academic HPC cluster: The UL experience [Internet]. [cited 2021 Mar  
446 24]. Available from: <https://ieeexplore.ieee.org/document/6903792>
- 447 20. Roume H, Heintz-Buschart A, Muller EEL, Wilmes P. Sequential isolation of metabolites,  
448 RNA, DNA, and proteins from the same unique sample. *Methods Enzymol.* 2013;531:219–36.
- 449 21. Köster J, Rahmann S. Snakemake—a scalable bioinformatics workflow engine.  
450 *Bioinformatics.* 2012;28:2520–2.
- 451 22. Chen S, Zhou Y, Chen Y, Gu J. fastp: an ultra-fast all-in-one FASTQ preprocessor.  
452 *Bioinformatics.* 2018;34:i884–90.
- 453 23. Andrews S, Others. FastQC: a quality control tool for high throughput sequence data.  
454 Babraham Bioinformatics, Babraham Institute, Cambridge, United Kingdom; 2010.
- 455 24. Kopylova E, Noé L, Touzet H. SortMeRNA: fast and accurate filtering of ribosomal RNAs in  
456 metatranscriptomic data. *Bioinformatics.* 2012;28:3211–7.
- 457 25. Bushnell B. BMap: A fast, accurate, splice-aware aligner [Internet]. Lawrence Berkeley  
458 National Lab. (LBNL), Berkeley, CA (United States); 2014 Mar. Report No.: LBNL-7065E.  
459 Available from: <https://www.osti.gov/biblio/1241166>
- 460 26. De Coster W, D’Hert S, Schultz DT, Cruts M, Van Broeckhoven C. NanoPack: visualizing  
461 and processing long-read sequencing data. *Bioinformatics.* 2018;34:2666–9.
- 462 27. Li D, Liu C-M, Luo R, Sadakane K, Lam T-W. MEGAHIT: an ultra-fast single-node solution  
463 for large and complex metagenomics assembly via succinct de Bruijn graph. *Bioinformatics.*  
464 2015;31:1674–6.
- 465 28. Nurk S, Meleshko D, Korobeynikov A, Pevzner PA. metaSPAdes: a new versatile  
466 metagenomic assembler. *Genome Res.* 05 2017;27:824–34.
- 467 29. Kolmogorov M, Bickhart DM, Behsaz B, Gurevich A, Rayko M, Shin SB, et al. metaFlye:  
468 scalable long-read metagenome assembly using repeat graphs. *Nat Methods.* 2020;17:1103–  
469 10.



- 470 30. Vaser R, Šikić M. Raven: a de novo genome assembler for long reads [Internet]. Cold  
471 Spring Harbor Laboratory. 2020 [cited 2021 Mar 19]. p. 2020.08.07.242461. Available from:  
472 <https://www.biorxiv.org/content/10.1101/2020.08.07.242461v1>
- 473 31. Vaser R, Sović I, Nagarajan N, Šikić M. Fast and accurate de novo genome assembly from  
474 long uncorrected reads. *Genome Res.* 2017;27:737–46.
- 475 32. Li H. Aligning sequence reads, clone sequences and assembly contigs with BWA-MEM  
476 [Internet]. arXiv [q-bio.GN]. 2013. Available from: <http://arxiv.org/abs/1303.3997>
- 477 33. medaka [Internet]. Github; [cited 2021 Mar 19]. Available from:  
478 <https://github.com/nanoporetech/medaka>
- 479 34. Li H. Minimap2: pairwise alignment for nucleotide sequences. *Bioinformatics.*  
480 2018;34:3094–100.
- 481 35. Quinlan AR, Hall IM. BEDTools: a flexible suite of utilities for comparing genomic features.  
482 *Bioinformatics.* 2010;26:841–2.
- 483 36. Hyatt D, Chen G-L, LoCascio PF, Land ML, Larimer FW, Hauser LJ. Prodigal: prokaryotic  
484 gene recognition and translation initiation site identification. *BMC Bioinformatics.* 2010;11:119.
- 485 37. Jia B, Raphenya AR, Alcock B, Waglechner N, Guo P, Tsang KK, et al. CARD 2017:  
486 expansion and model-centric curation of the comprehensive antibiotic resistance database.  
487 *Nucleic Acids Res.* 2017;45:D566–73.
- 488 38. Buchfink B, Xie C, Huson DH. Fast and sensitive protein alignment using DIAMOND. *Nat*  
489 *Methods.* 2015;12:59–60.
- 490 39. Seemann T. barrnap 0.9: rapid ribosomal RNA prediction. *Google Scholar.* 2013;
- 491 40. Mikheenko A, Saveliev V, Gurevich A. MetaQUAST: evaluation of metagenome assemblies.  
492 *Bioinformatics.* 2016;32:1088–90.
- 493 41. Ondov BD, Treangen TJ, Melsted P, Mallonee AB, Bergman NH, Koren S, et al. Mash: fast  
494 genome and metagenome distance estimation using MinHash. *Genome Biol.* 2016;17:132.
- 495 42. Steinegger M, Söding J. MMseqs2 enables sensitive protein sequence searching for the  
496 analysis of massive data sets. *Nat Biotechnol.* 2017;35:1026–8.
- 497 43. biomickwatson. A simple test for uncorrected insertions and deletions (indels) in bacterial  
498 genomes [Internet]. 2018 [cited 2021 Mar 19]. Available from: [http://www.opiniomics.org/a-](http://www.opiniomics.org/a-simple-test-for-uncorrected-insertions-and-deletions-indels-in-bacterial-genomes/)  
499 [simple-test-for-uncorrected-insertions-and-deletions-indels-in-bacterial-genomes/](http://www.opiniomics.org/a-simple-test-for-uncorrected-insertions-and-deletions-indels-in-bacterial-genomes/)
- 500 44. The Universal Protein Resource (UniProt). *Nucleic Acids Res.* 2008-1;36:D190–5.
- 501 45. cRAP protein sequences [Internet]. [cited 2021 Mar 19]. Available from:  
502 <https://www.thegpm.org/crap/>
- 503 46. Barsnes H, Vaudel M. SearchGUI: A Highly Adaptable Common Interface for Proteomics  
504 Search and de Novo Engines. *J Proteome Res.* 2018;17:2552–5.
- 505 47. Langella O, Valot B, Balliau T, Blein-Nicolas M, Bonhomme L, Zivy M. XITandemPipeline: A

- 506 Tool to Manage Sequence Redundancy for Protein Inference and Phosphosite Identification. *J*  
507 *Proteome Res.* 2017;16:494–503.
- 508 48. Kim S, Pevzner PA. MS-GF+ makes progress towards a universal database search tool for  
509 proteomics. *Nat Commun.* 2014;5:5277.
- 510 49. Eng JK, Jahan TA, Hoopmann MR. Comet: an open-source MS/MS sequence database  
511 search tool. *Proteomics.* 2013;13:22–4.
- 512 50. Vaudel M, Burkhardt JM, Zahedi RP, Oveland E, Berven FS, Sickmann A, et al.  
513 PeptideShaker enables reanalysis of MS-derived proteomics data sets. *Nat Biotechnol.*  
514 2015;33:22–4.
- 515 51. Conway JR, Lex A, Gehlenborg N. UpSetR: an R package for the visualization of  
516 intersecting sets and their properties. *Bioinformatics.* Oxford Academic; 2017;33:2938–40.
- 517 52. Wickham H. *ggplot2: Elegant Graphics for Data Analysis.* Springer; 2016.

518

## 519 Figures and Tables

### 520 Figures

521 **Fig. 1: Discrepancy and uniqueness of predicted proteins in assemblies.** i Number of  
 522 proteins (total and partial) predicted by Prodigal in each assembly and sample. The color  
 523 corresponds to the tool used for metagenomic assembly. ii Number of shared assembly proteins  
 524 which were clustered using MMSesq2 per sample. Each protein cluster was labeled by the  
 525 combination of assembly tools represented by the clustered proteins (i.e., the assembly where  
 526 these proteins originated from). The depicted number of shared proteins per assembly tool  
 527 combination is the total protein count over all associated clusters. Top 20 combinations are  
 528 shown. The number of proteins found in clusters representing all assembly tools is highlighted in  
 529 red; the number of proteins exclusive to an assembly is highlighted in orange.

530 i)

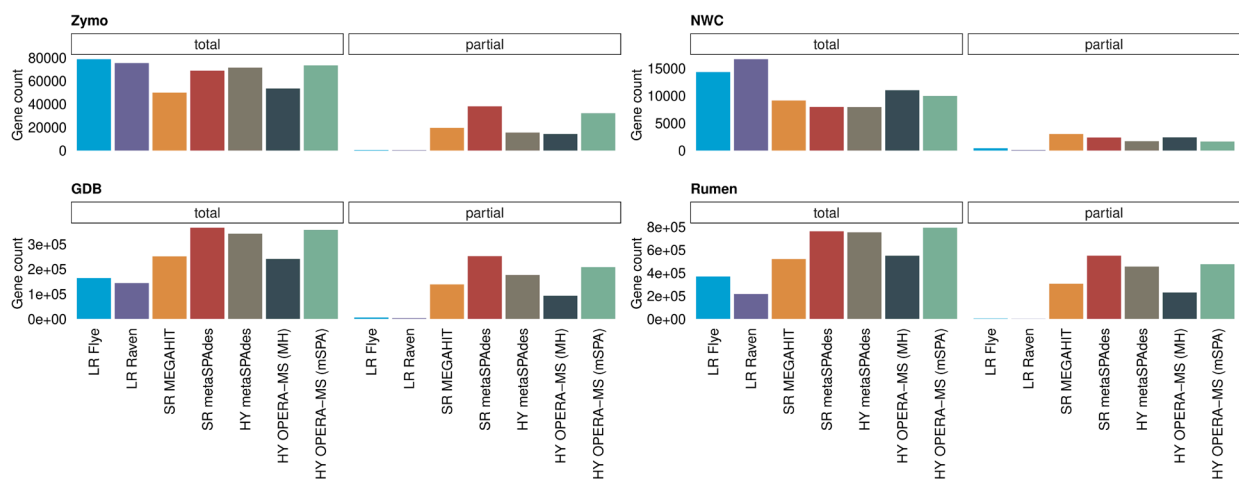

531

532

533 ii)

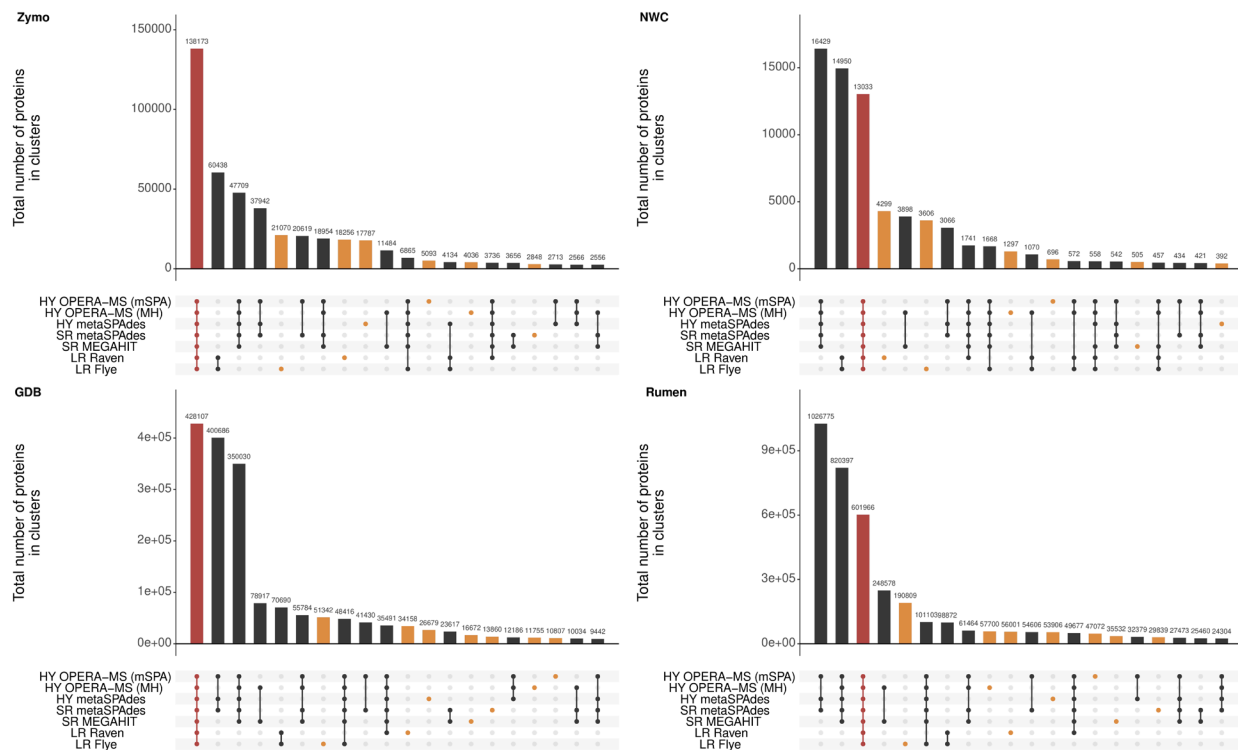

534

535

536 **Fig. 2: Assembly affects antimicrobial resistance gene identification.** i Number of hits (total,  
 537 “strict” and “nudged”) for each assembly and sample when searching the assembly proteins in  
 538 the CARD database using RGI. Sample NWC was excluded because no hits were found in any  
 539 of its assemblies. “Nudged” hits are loose hits flagged as “nudged” by RGI; the remaining hits are  
 540 “strict” hits. ii Number of AROs which were covered by “strict” RGI hits by different assemblies  
 541 per sample. The bar plot shows the number of shared AROs per assembly tools combination.  
 542 Metatranscriptomic (metaT) coverage of the two coding sequences (CDSs) from the long-read  
 543 (LR) assembly constructed with Flye and having a “nudged” RGI hit to ARO 3004454 (a  
 544 chloramphenicol acetyltransferase) in sample GDB. The x-axis represents the contig coordinates  
 545 and the y-axis the metaT coverage. The amino acid sequence of the two CDSs and the ARO is  
 546 included in the plot.

547 i)

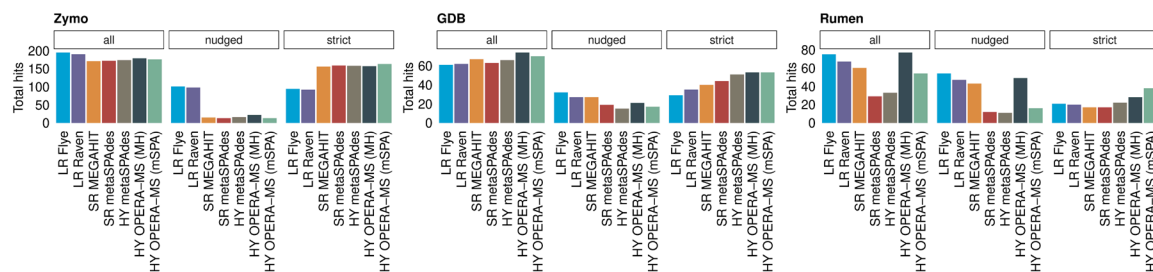

548

549 ii)

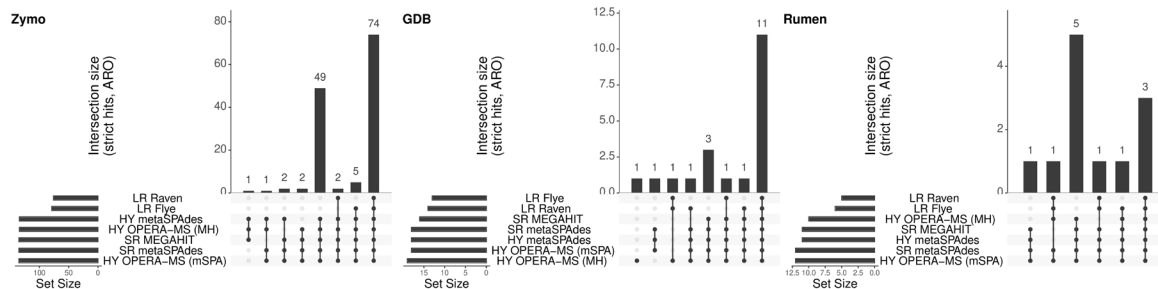

550

551 iii)

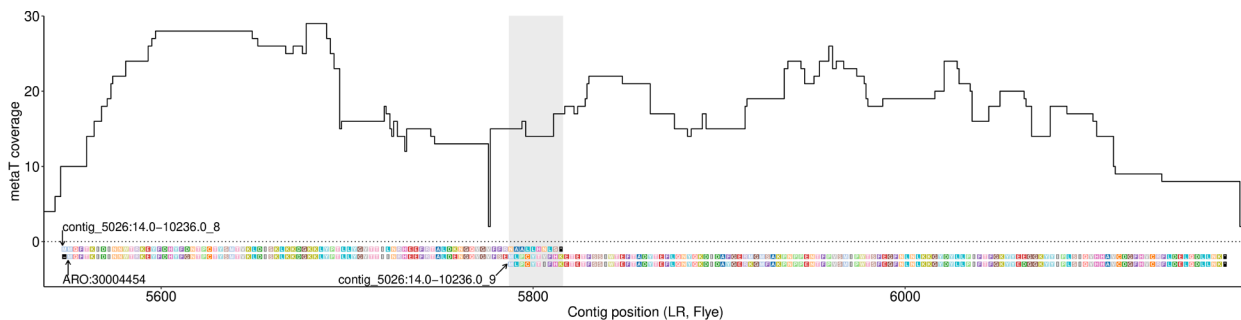

552

553

## 554 Supplementary figures

555 **Supp. Fig. 1: Assembly statistics.** Assembly statistics for each assembly and sample including  
 556 the total number of contigs, number of N bases per 100kbp, L50 value (number of contigs), N50  
 557 value (in bps), the length of the largest contig (in bps), and the total assembly length (in bps). The  
 558 color corresponds to the tool used for metagenomic assembly.

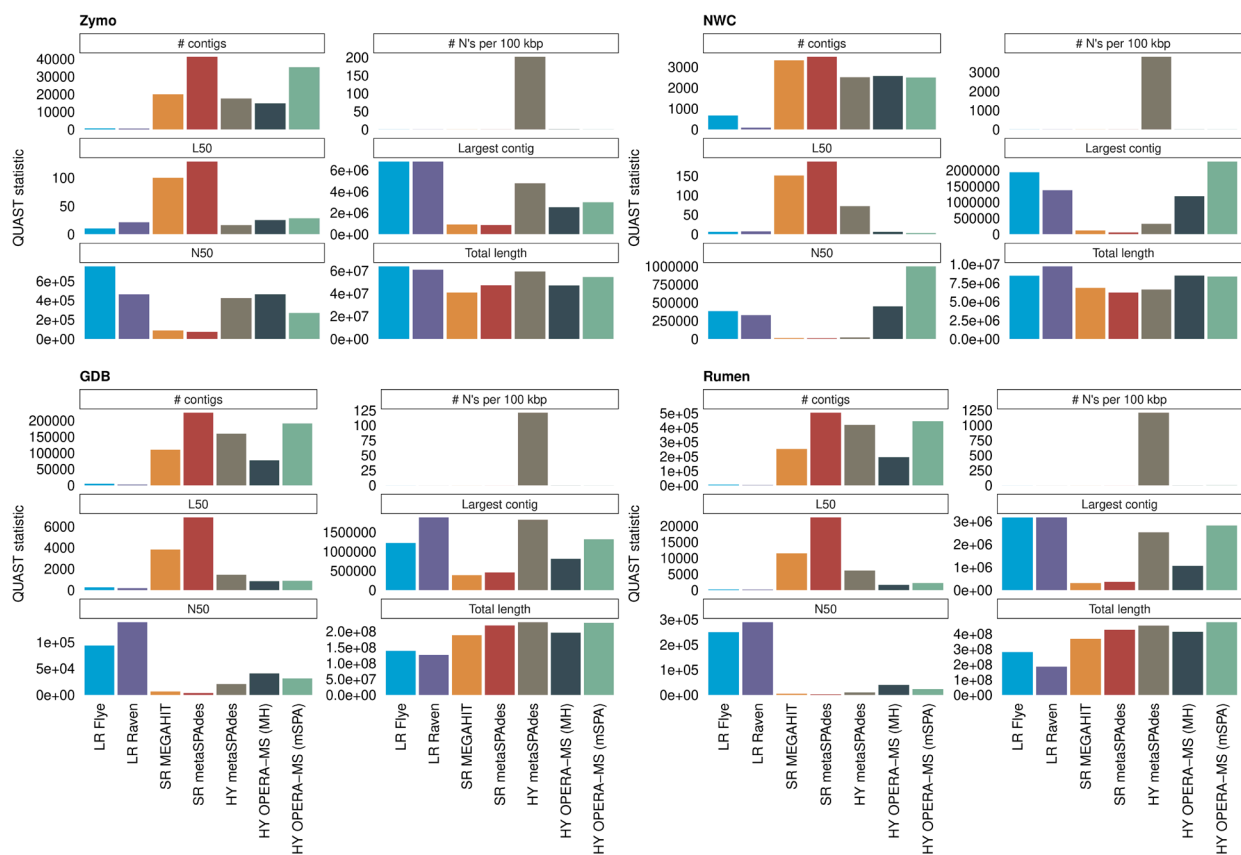

559

560

561 **Supp. Fig. 2: Mapping rate of metagenomic reads.** Mapping rate of metagenomic reads to  
 562 each assembly for each sample considering all contigs and contigs being at least 1000, 2000 and  
 563 5000bps long. The color corresponds to the tool used for metagenomic assembly.

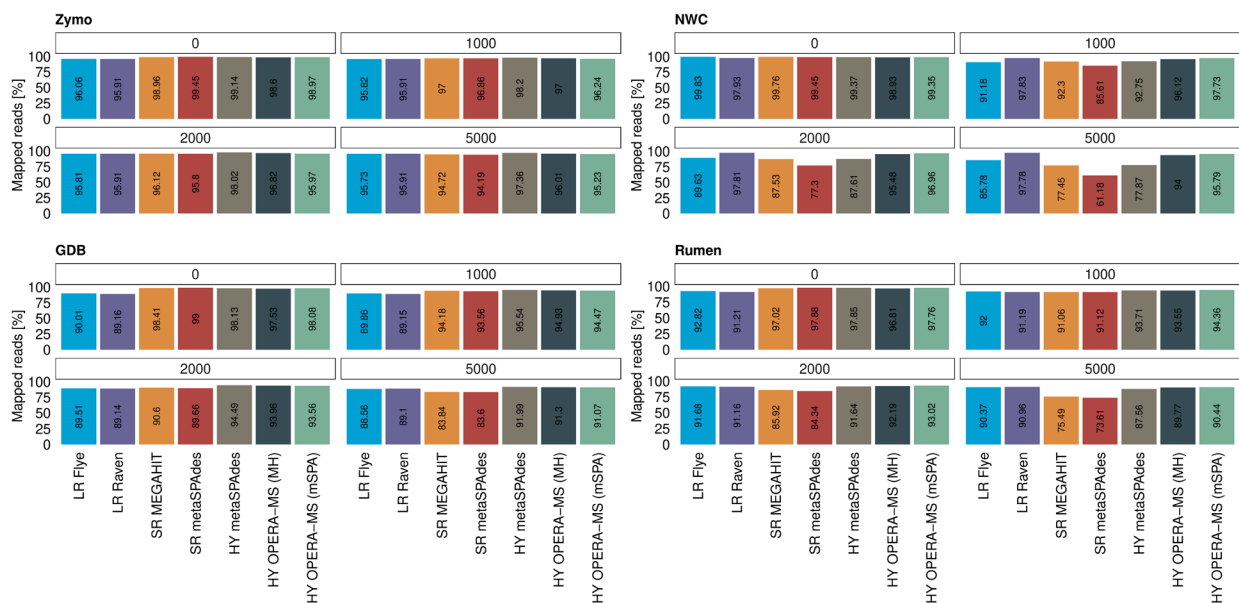

564 **Supp. Fig. 3: Mapping rate of metatranscriptomic reads.** Mapping rate of metatranscriptomic  
 565 reads to each assembly in GDB considering all contigs and contigs being at least 1000, 2000 and  
 566 5000bps long. The color corresponds to the tool used for metagenomic assembly.

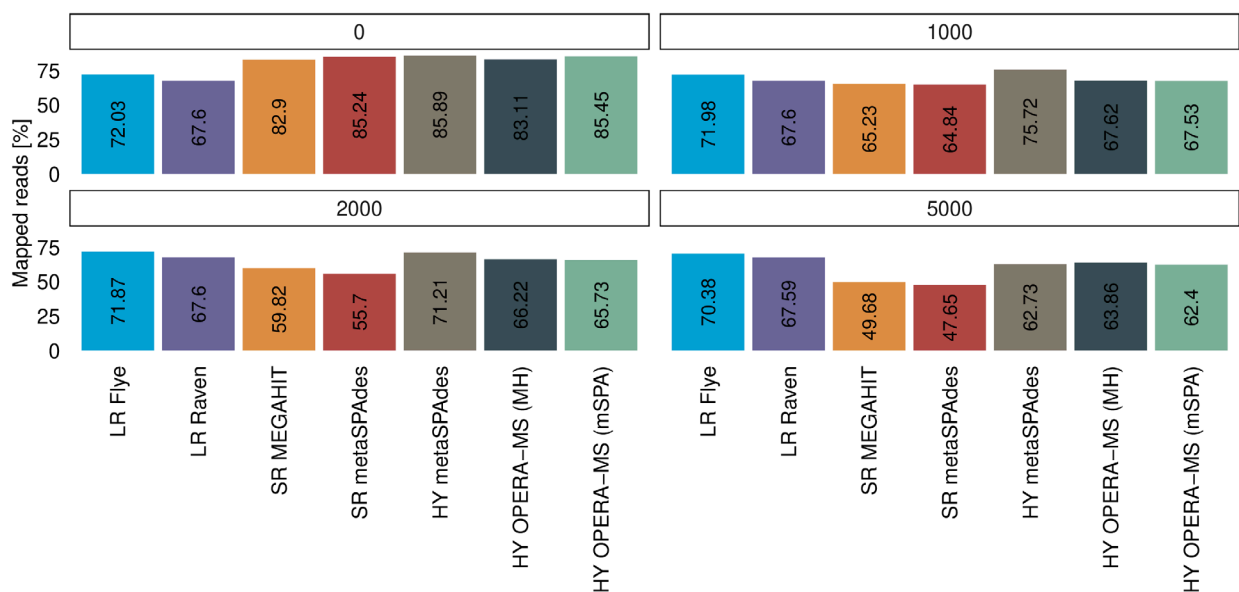

568  
 569

570 **Supp. Fig. 4: Assembly similarity.** Heatmap of assembly dissimilarity of each sample. The cell  
 571 color corresponds to the estimated dissimilarity value and the rounded value is shown in each  
 572 cell: higher values (yellow) indicate higher dissimilarity, lower values (dark purple) indicate high  
 573 similarity. Assemblies were grouped using hierarchical clustering (linkage method “complete”):  
 574 the resulting trees are shown in the heatmaps.

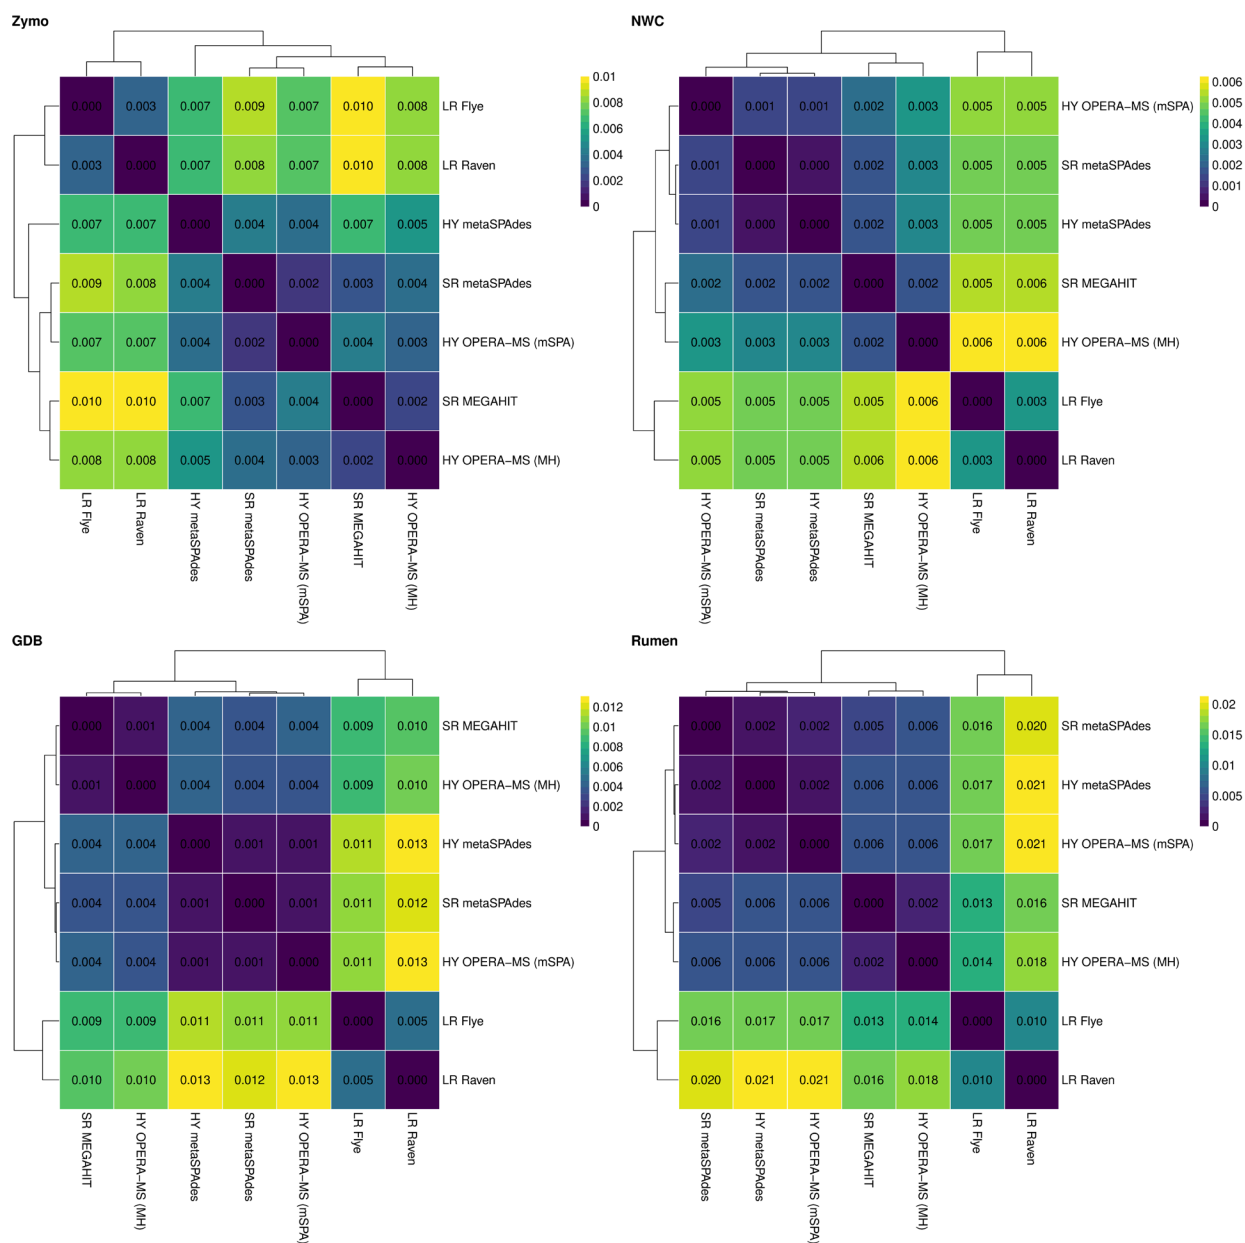

575

576



577 **Supp. Fig. 5: Protein sequence search in the UniProtKB/TrEMBL nr database.** Density  
578 distribution of the query/subject length ratios of the best hit obtained in the protein sequence  
579 search in the UniProtKB/TrEMBL nr database for each assembly and sample. The color  
580 corresponds to the tool used for metagenomic assembly.

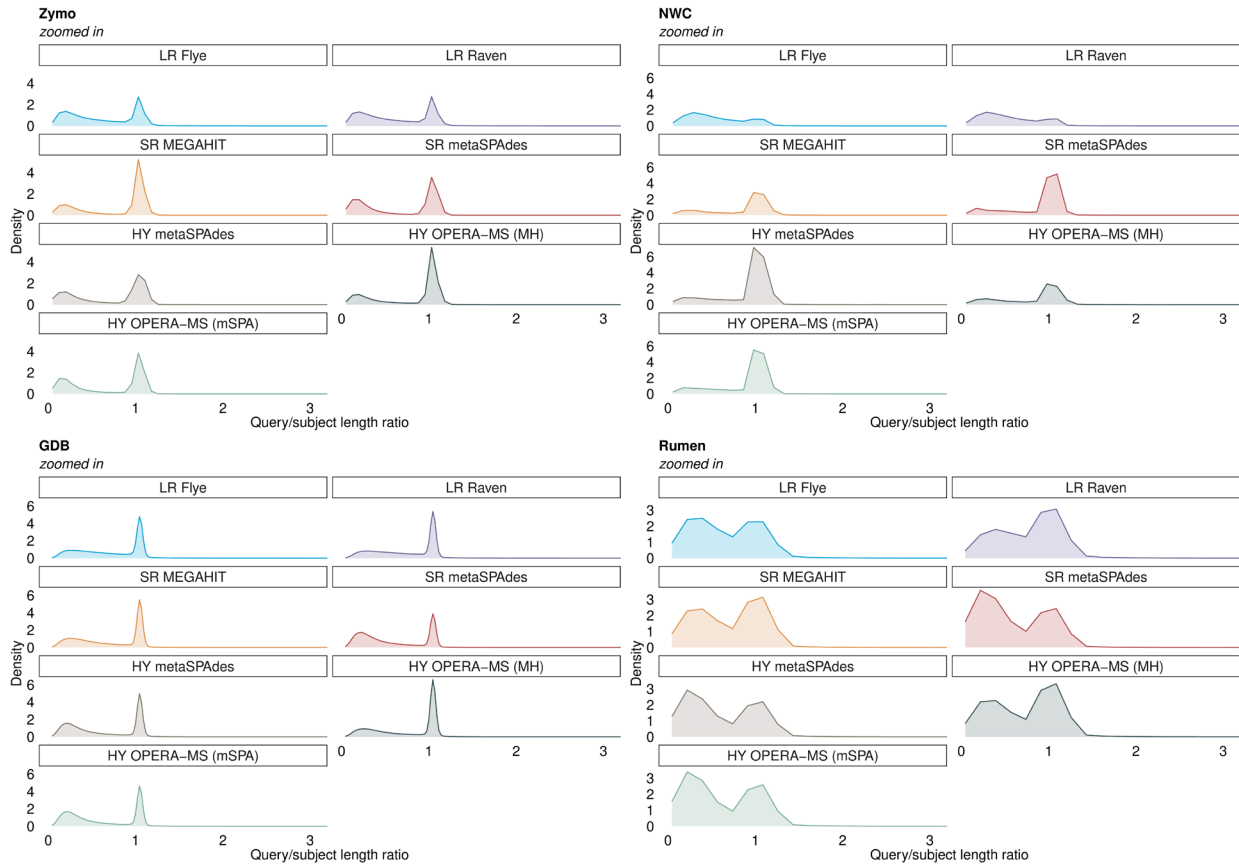

581

582

583 **Supp. Fig. 6: Prediction of rRNA genes.** Number of rRNA genes (complete, partial and total)  
 584 found by barrnap in assembly contigs using different rRNA gene databases (Archaea, Bacteria,  
 585 Eukaryota and Metazoan mitochondria) for each assembly and sample. The color corresponds to  
 586 the tool used for metagenomic assembly.

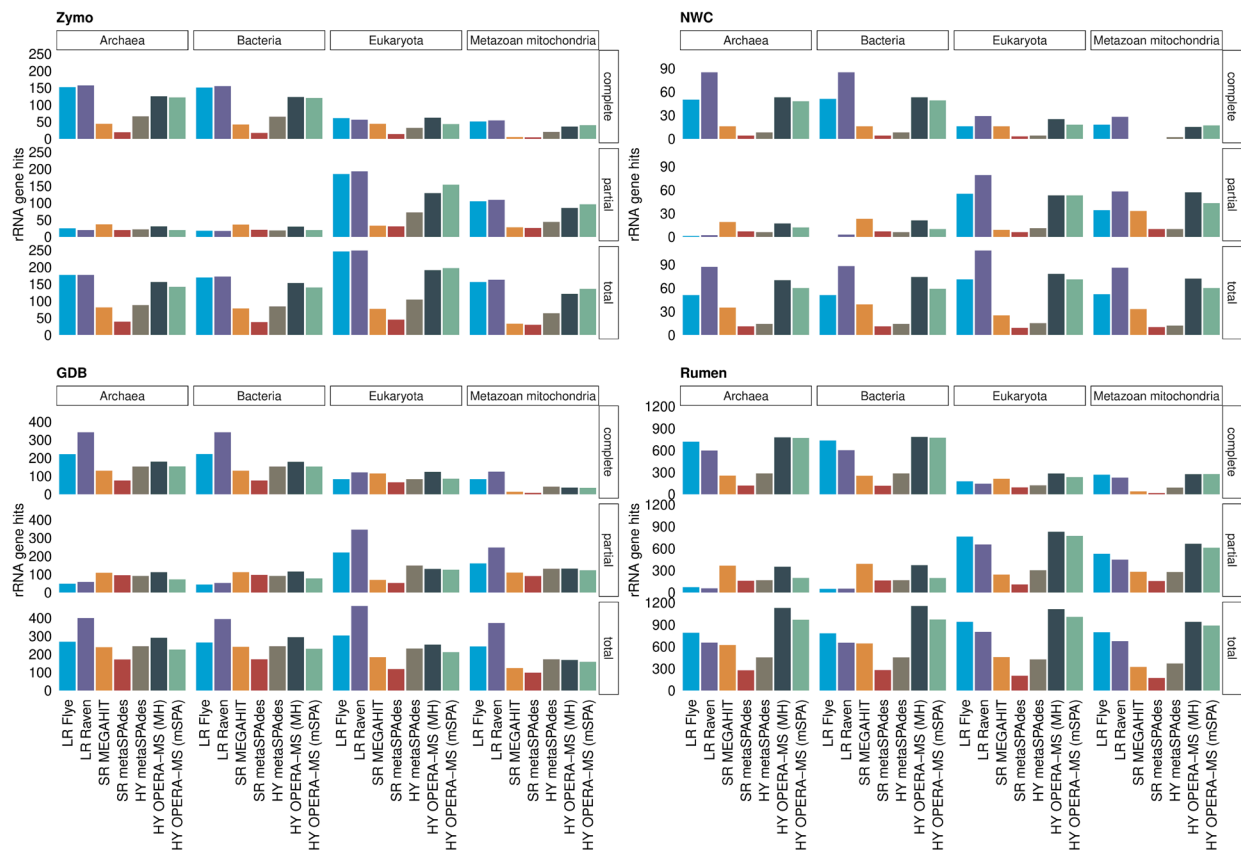

587

588

## 589 Supplementary tables

590 **Supp. Tab. 1: Proteins assigned to exclusive AROs in GDB.** Information on proteins from GDB  
591 assemblies assigned to AROs found exclusively in SR and HY assemblies when considering only  
592 “strict” RGI hits, i.e., AROs 3000194, 3002999 and 3004454. The table includes the protein ID,  
593 the RGI hit information (RGI Detection Paradigm, ARO term of top hit in CARD, percent identity  
594 of match to top hit in CARD, ARO ID, CARD detection model type, ARO’s drug class and  
595 mechanism, flag whether the hit was “nudged” from “loose” to “strict”), the assembly tool,  
596 additional protein information (contig ID, protein number on the source contig, start and end  
597 coordinates on the contig, Prodigal’s annotation information) and average metaT coverage.

| ORF_ID                                   | Cut_Off | Best_Hit_ARO                                         | Best_Identities | ARO     | Model_type            | Drug_Class              | Resistance_Mechanism         | Nudged | tool               | contig_id                            | prot_num | start  | end    | strand | info                                                                                     | ave_cov     |
|------------------------------------------|---------|------------------------------------------------------|-----------------|---------|-----------------------|-------------------------|------------------------------|--------|--------------------|--------------------------------------|----------|--------|--------|--------|------------------------------------------------------------------------------------------|-------------|
| k141_88921_2                             | Perfect | letW                                                 | 100             | 3000194 | protein homolog model | tetracycline antibiotic | antibiotic target protection |        | SR MEGAHit         | k141_88921                           | 2        | 808    | 2727   | -1     | ID=5257_2;partial=00;start_type=ATG;rbg_motif=GGAGG;rbg_spacer=5-10bp;gc_cont=0.531      | 14.81669667 |
| k141_44694_172                           | Perfect | CblA-1                                               | 100             | 3002990 | protein homolog model | cephalosporin           | antibiotic inactivation      |        | SR MEGAHit         | k141_44694                           | 172      | 210694 | 211554 | -1     | ID=9454_172;partial=00;start_type=ATG;rbg_motif=TAAA;rbg_spacer=12bp;gc_cont=0.485       | 18.57687991 |
| k141_37405_1                             | Strict  | Campylobacter coli chloramphenicol acetyltransferase | 96.14           | 3004454 | protein homolog model | phenicol antibiotic     | antibiotic inactivation      |        | SR MEGAHit         | k141_37405                           | 1        | 46     | 669    | -1     | ID=42126_1;partial=00;start_type=ATG;rbg_motif=GGAGG;rbg_spacer=5-10bp;gc_cont=0.370     | 18.33974358 |
| k141_59580_1                             | Strict  | letW                                                 | 100             | 3000194 | protein homolog model | tetracycline antibiotic | antibiotic target protection | True   | SR MEGAHit         | k141_59580                           | 1        | 1      | 1071   | -1     | ID=46787_1;partial=10;start_type=ATG;rbg_motif=AGGAGG;rbg_spacer=5-10bp;gc_cont=0.430    | 5.194211018 |
| k141_105836_1                            | Strict  | letW                                                 | 97.83           | 3000194 | protein homolog model | tetracycline antibiotic | antibiotic target protection | True   | SR MEGAHit         | k141_105836                          | 1        | 500    | 640    | -1     | ID=67436_1;partial=01;start_type=ATG;rbg_motif=GGAGG;rbg_spacer=5-10bp;gc_cont=0.511     | 0           |
| NODE_12_length_289084_cov_116.206895_175 | Perfect | CblA-1                                               | 100             | 3002990 | protein homolog model | cephalosporin           | antibiotic inactivation      |        | SR metaSPAdes      | NODE_12_length_289084_cov_116.206895 | 175      | 215250 | 216140 | -1     | ID=12_175;partial=00;start_type=ATG;rbg_motif=TAAA;rbg_spacer=12bp;gc_cont=0.485         | 18.57687991 |
| NODE_3961_length_5598_cov_17.248325_7    | Strict  | Campylobacter coli chloramphenicol acetyltransferase | 96.02           | 3004454 | protein homolog model | phenicol antibiotic     | antibiotic inactivation      |        | SR metaSPAdes      | NODE_3961_length_5598_cov_17.248325  | 7        | 4994   | 5596   | -1     | ID=3961_7;partial=01;start_type=ATG;rbg_motif=GGAGG;rbg_spacer=5-10bp;gc_cont=0.371      | 17.85406302 |
| NODE_8958_length_2718_cov_51.879591_1    | Perfect | letW                                                 | 100             | 3000194 | protein homolog model | tetracycline antibiotic | antibiotic target protection |        | SR metaSPAdes      | NODE_8958_length_2718_cov_51.879591  | 1        | 352    | 2271   | -1     | ID=8958_1;partial=00;start_type=ATG;rbg_motif=GGAGG;rbg_spacer=5-10bp;gc_cont=0.531      | 14.76770833 |
| contig_210.1.0-492442.0_427              | Strict  | CblA-1                                               | 100             | 3002990 | protein homolog model | cephalosporin           | antibiotic inactivation      | True   | LR Flye            | contig_210.1.0-492442.0              | 427      | 345531 | 346178 | -1     | ID=1098_427;partial=00;start_type=ATG;rbg_motif=TAAA;rbg_spacer=12bp;gc_cont=0.475       | 21.51388889 |
| contig_210.1.0-492442.0_428              | Strict  | CblA-1                                               | 100             | 3002990 | protein homolog model | cephalosporin           | antibiotic inactivation      | True   | LR Flye            | contig_210.1.0-492442.0              | 428      | 346165 | 346422 | -1     | ID=1098_428;partial=00;start_type=ATG;rbg_motif=None;rbg_spacer=None;gc_cont=0.504       | 10.89147287 |
| contig_2107.1.0-6493.0_10                | Strict  | letW                                                 | 100             | 3000194 | protein homolog model | tetracycline antibiotic | antibiotic target protection | True   | LR Flye            | contig_2107.1.0-6493.0               | 10       | 6589   | 6672   | -1     | ID=1107_10;partial=01;start_type=Edge;rbg_motif=None;rbg_spacer=None;gc_cont=0.488       | 1.94047619  |
| contig_5026.14.0-10236.0_9               | Strict  | Campylobacter coli chloramphenicol acetyltransferase | 96.1            | 3004454 | protein homolog model | phenicol antibiotic     | antibiotic inactivation      | True   | LR Flye            | contig_5026.14.0-10236.0             | 8        | 5547   | 5816   | -1     | ID=4198_8;partial=00;start_type=ATG;rbg_motif=GGAGG;rbg_spacer=3-4bp;gc_cont=0.356       | 19.90740741 |
| contig_5026.14.0-10236.0_9               | Strict  | Campylobacter coli chloramphenicol acetyltransferase | 96.09           | 3004454 | protein homolog model | phenicol antibiotic     | antibiotic inactivation      | True   | LR Flye            | contig_5026.14.0-10236.0             | 9        | 5788   | 6174   | -1     | ID=4198_9;partial=00;start_type=ATG;rbg_motif=3BaseSBMM;rbg_spacer=13-15bp;gc_cont=0.377 | 16.38113696 |
| contig_720.1.0-180574.0_143              | Strict  | letW                                                 | 100             | 3000194 | protein homolog model | tetracycline antibiotic | antibiotic target protection | True   | LR Flye            | contig_720.1.0-180574.0              | 143      | 113111 | 113386 | -1     | ID=4795_143;partial=00;start_type=ATG;rbg_motif=AGGAGG;rbg_spacer=5-10bp;gc_cont=0.504   | 2.347828087 |
| contig_720.1.0-180574.0_145              | Strict  | letW                                                 | 99.58           | 3000194 | protein homolog model | tetracycline antibiotic | antibiotic target protection | True   | LR Flye            | contig_720.1.0-180574.0              | 145      | 114312 | 115028 | -1     | ID=4795_145;partial=00;start_type=TTG;rbg_motif=AGGAGG;rbg_spacer=11-12bp;gc_cont=0.531  | 6.154811715 |
| Utg192512.1.0-55330.0_65                 | Strict  | letW                                                 | 100             | 3000194 | protein homolog model | tetracycline antibiotic | antibiotic target protection | True   | LR Raven           | Utg192512.1.0-55330.0                | 65       | 53663  | 53938  | -1     | ID=184_65;partial=00;start_type=ATG;rbg_motif=GGAGG;rbg_spacer=5-10bp;gc_cont=0.507      | 0.753623188 |
| Utg192512.1.0-55330.0_66                 | Strict  | letW                                                 | 99.38           | 3000194 | protein homolog model | tetracycline antibiotic | antibiotic target protection | True   | LR Raven           | Utg192512.1.0-55330.0                | 66       | 53626  | 54432  | -1     | ID=184_66;partial=00;start_type=TTG;rbg_motif=AGGAGG;rbg_spacer=11-12bp;gc_cont=0.525    | 2.362919132 |
| Utg193156.1.0-36767.0_53                 | Strict  | letW                                                 | 95.28           | 3000194 | protein homolog model | tetracycline antibiotic | antibiotic target protection | True   | LR Raven           | Utg193156.1.0-36767.0                | 53       | 36661  | 37176  | -1     | ID=450_53;partial=00;start_type=ATG;rbg_motif=None;rbg_spacer=None;gc_cont=0.535         | 0.426356589 |
| Utg193258.12.0-497832.0_131              | Strict  | CblA-1                                               | 100             | 3002990 | protein homolog model | cephalosporin           | antibiotic inactivation      | True   | LR Raven           | Utg193258.12.0-497832.0              | 131      | 112535 | 113116 | -1     | ID=489_131;partial=00;start_type=ATG;rbg_motif=TAAA;rbg_spacer=12bp;gc_cont=0.479        | 22.70618557 |
| Utg194422.1.0-41914.0_3                  | Strict  | letW                                                 | 97.96           | 3000194 | protein homolog model | tetracycline antibiotic | antibiotic target protection | True   | LR Raven           | Utg194422.1.0-41914.0                | 3        | 2784   | 3251   | -1     | ID=908_3;partial=00;start_type=TTG;rbg_motif=AGGAGG;rbg_spacer=11-12bp;gc_cont=0.528     | 1.386752137 |
| Utg196264.1.0-22987.0_38                 | Strict  | letW                                                 | 95.74           | 3000194 | protein homolog model | tetracycline antibiotic | antibiotic target protection | True   | LR Raven           | Utg196264.1.0-22987.0                | 38       | 22691  | 23314  | -1     | ID=1406_38;partial=00;start_type=GTG;rbg_motif=None;rbg_spacer=None;gc_cont=0.535        | 4.288461538 |
| Utg197488.1.0-10247.0_3                  | Strict  | letW                                                 | 100             | 3000194 | protein homolog model | tetracycline antibiotic | antibiotic target protection | True   | LR Raven           | Utg197488.1.0-10247.0                | 3        | 1339   | 1545   | -1     | ID=1693_3;partial=00;start_type=ATG;rbg_motif=GGAGG;rbg_spacer=5-10bp;gc_cont=0.522      | 3.579710145 |
| NODE_1_length_1822148_cov_145.496205_549 | Perfect | CblA-1                                               | 100             | 3002990 | protein homolog model | cephalosporin           | antibiotic inactivation      |        | HY metaSPAdes      | NODE_1_length_1822148_cov_145.496205 | 549      | 611846 | 612736 | -1     | ID=1_549;partial=00;start_type=ATG;rbg_motif=TAAA;rbg_spacer=12bp;gc_cont=0.485          | 18.57687991 |
| NODE_230_length_104252_cov_9.790458_35   | Perfect | letW                                                 | 100             | 3000194 | protein homolog model | tetracycline antibiotic | antibiotic target protection |        | HY metaSPAdes      | NODE_230_length_104252_cov_9.790458  | 35       | 38586  | 40505  | -1     | ID=230_35;partial=00;start_type=ATG;rbg_motif=GGAGG;rbg_spacer=5-10bp;gc_cont=0.531      | 7.6453125   |
| NODE_348_length_69013_cov_11.179239_18   | Perfect | letW                                                 | 100             | 3000194 | protein homolog model | tetracycline antibiotic | antibiotic target protection |        | HY metaSPAdes      | NODE_348_length_69013_cov_11.179239  | 18       | 10767  | 12686  | -1     | ID=348_18;partial=00;start_type=ATG;rbg_motif=GGAGG;rbg_spacer=5-10bp;gc_cont=0.531      | 7.191145833 |
| NODE_5177_length_5598_cov_17.248325_7    | Strict  | Campylobacter coli chloramphenicol acetyltransferase | 96.02           | 3004454 | protein homolog model | phenicol antibiotic     | antibiotic inactivation      |        | HY metaSPAdes      | NODE_5177_length_5598_cov_17.248325  | 7        | 4994   | 5596   | -1     | ID=5177_7;partial=01;start_type=ATG;rbg_motif=GGAGG;rbg_spacer=5-10bp;gc_cont=0.371      | 17.85406302 |
| opera_contig_1206_6                      | Perfect | letW                                                 | 100             | 3000194 | protein homolog model | tetracycline antibiotic | antibiotic target protection |        | HY OPERA-MS (MH)   | opera_contig_1206                    | 6        | 3769   | 5688   | -1     | ID=1206_6;partial=00;start_type=ATG;rbg_motif=GGAGG;rbg_spacer=5-10bp;gc_cont=0.531      | 14.81666667 |
| opera_contig_1626_1                      | Strict  | Campylobacter coli chloramphenicol acetyltransferase | 96.14           | 3004454 | protein homolog model | phenicol antibiotic     | antibiotic inactivation      |        | HY OPERA-MS (MH)   | opera_contig_1626                    | 1        | 46     | 669    | -1     | ID=1626_1;partial=00;start_type=ATG;rbg_motif=GGAGG;rbg_spacer=5-10bp;gc_cont=0.370      | 18.33974359 |
| opera_contig_17222_1                     | Strict  | letW                                                 | 97.83           | 3000194 | protein homolog model | tetracycline antibiotic | antibiotic target protection | True   | HY OPERA-MS (MH)   | opera_contig_17222                   | 1        | 500    | 640    | -1     | ID=17222_1;partial=01;start_type=ATG;rbg_motif=GGAGG;rbg_spacer=5-10bp;gc_cont=0.511     | 0           |
| opera_contig_76911_177                   | Perfect | CblA-1                                               | 100             | 3002990 | protein homolog model | cephalosporin           | antibiotic inactivation      |        | HY OPERA-MS (MH)   | opera_contig_76911                   | 177      | 215801 | 216691 | -1     | ID=76911_177;partial=00;start_type=ATG;rbg_motif=TAAA;rbg_spacer=12bp;gc_cont=0.485      | 18.57687991 |
| opera_contig_1579_7                      | Strict  | Campylobacter coli chloramphenicol acetyltransferase | 96.02           | 3004454 | protein homolog model | phenicol antibiotic     | antibiotic inactivation      |        | HY OPERA-MS (mSPA) | opera_contig_1579                    | 7        | 4994   | 5596   | -1     | ID=1579_7;partial=01;start_type=ATG;rbg_motif=GGAGG;rbg_spacer=5-10bp;gc_cont=0.371      | 17.85406302 |
| opera_contig_2773_1                      | Perfect | letW                                                 | 100             | 3000194 | protein homolog model | tetracycline antibiotic | antibiotic target protection |        | HY OPERA-MS (mSPA) | opera_contig_2773                    | 1        | 352    | 2271   | -1     | ID=2773_1;partial=00;start_type=ATG;rbg_motif=GGAGG;rbg_spacer=5-10bp;gc_cont=0.531      | 14.76770833 |
| opera_contig_190552_176                  | Perfect | CblA-1                                               | 100             | 3002990 | protein homolog model | cephalosporin           | antibiotic inactivation      |        | HY OPERA-MS (mSPA) | opera_contig_190552                  | 176      | 215253 | 216143 | -1     | ID=190552_176;partial=00;start_type=ATG;rbg_motif=TAAA;rbg_spacer=12bp;gc_cont=0.485     | 18.57687991 |
